# Supplementary material for: Circulating bilirubin levels and risk of colorectal cancer: serological and Mendelian randomization analyses
Source: PubMed Central journal article supplement (PMC7469292; doi:10.1186/s12916-020-01703-w), 2020-09-03
Supplement: 12916_2020_1703_MOESM1_ESM.pdf [file 12916_2020_1703_MOESM1_ESM.pdf]

## **Circulating Bilirubin Levels and Risk of Colorectal Cancer: Serological and Mendelian Randomization Analyses**

Nazlisadat Seyed Khoei, Mazda Jenab, Neil Murphy, Barbara L. Banbury, Robert Carreras-Torres, Vivian Viallon, et al.

### **Corresponding Author:**

Heinz Freisling, PhD  
International Agency for Research on Cancer (IARC-WHO)  
150 cours Albert Thomas  
69372 Lyon CEDEX 08, France  
Off. +33 472 738 664  
E-mail: [freislingh@iarc.fr](mailto:freislingh@iarc.fr)

### **Additional file 1: Supplementary Tables 1-6, Supplementary Figures 1-3, and Supplementary Text 1**

Supplementary Table 1 | Summary statistics for the genetic association with bilirubin levels, and sex-stratified colorectal cancer risk.

Supplementary Table 2 | Participating studies in genetic consortia (GECCO/ CCFR/ and CORECT)

Supplementary Table 3 | The association between unconjugated bilirubin (UCB) levels and colorectal cancer risk after different sensitivity analyses in the EPIC study

Supplementary Table 4 | Results for Mendelian randomization sensitivity analyses

Supplementary Table 5 | Results for the Mendelian randomization sensitivity analyses: positive control outcomes for pancreatic cancer

Supplementary Table 6 | Results for genome-wide associations of instruments with other phenotypes

Supplementary Figure 1 | Cubic spline modelling of unconjugated bilirubin (UCB) levels in relation to colorectal cancer risk in the EPIC study

Supplementary Figure 2 | Association between *UGT1A1* polymorphism (rs6431625) and unconjugated bilirubin (UCB) levels in the EPIC study (with available GWAS data)

Supplementary Figure 3 | Directed acyclic graph (DAG) of the causal structure of associations between unconjugated bilirubin (UCB) levels in relation to colorectal cancer risk in the EPIC study

Supplementary Text 1 | Specific funding sources and acknowledgements of participating studies.

**Supplementary Table 1 | Summary statistics for the genetic association with bilirubin levels, and sex-stratified colorectal cancer risk**

| SNP              | Chr      | Base pair position | Effect allele | Reference allele | Total bilirubin |              |                        | CRC in men   |              | CRC in women |              |
|------------------|----------|--------------------|---------------|------------------|-----------------|--------------|------------------------|--------------|--------------|--------------|--------------|
|                  |          |                    |               |                  | Beta            | SE           | Explained variance (%) | Beta         | SE           | Beta         | SE           |
| rs2375279        | 1        | 25541931           | C             | T                | 0.022           | 0.004        | 1.29E-04               | -0.009       | 0.019        | 0.003        | 0.019        |
| rs17513135       | 1        | 40035686           | C             | T                | 0.018           | 0.003        | 1.17E-04               | -0.028       | 0.016        | 0.003        | 0.016        |
| rs6682423        | 1        | 63171063           | T             | C                | 0.021           | 0.003        | 1.98E-04               | 0.011        | 0.015        | 0.011        | 0.015        |
| rs1762486        | 1        | 107627697          | A             | G                | 0.020           | 0.003        | 1.78E-04               | -0.036       | 0.015        | -0.013       | 0.015        |
| rs61812598       | 1        | 154420087          | A             | G                | 0.016           | 0.003        | 1.24E-04               | -0.003       | 0.014        | -0.025       | 0.014        |
| rs857725         | 1        | 158607935          | T             | G                | 0.033           | 0.003        | 4.33E-04               | 0.018        | 0.015        | 0.001        | 0.015        |
| rs788644         | 1        | 202256962          | G             | T                | 0.018           | 0.003        | 1.56E-04               | 0.001        | 0.014        | 0.007        | 0.014        |
| rs1874121        | 1        | 220969049          | T             | C                | 0.023           | 0.003        | 2.47E-04               | -0.024       | 0.015        | -0.006       | 0.015        |
| rs556107         | 1        | 234853059          | T             | C                | 0.021           | 0.003        | 2.28E-04               | 0.029        | 0.014        | 0.016        | 0.014        |
| rs13030095       | 2        | 26026598           | A             | G                | 0.015           | 0.003        | 9.79E-05               | -0.012       | 0.015        | 0.025        | 0.015        |
| rs2053799        | 2        | 32883197           | G             | A                | 0.015           | 0.003        | 1.03E-04               | -0.013       | 0.014        | 0.000        | 0.014        |
| rs4671605        | 2        | 64887382           | T             | C                | 0.021           | 0.003        | 1.65E-04               | 0.004        | 0.016        | -0.017       | 0.016        |
| rs6734238        | 2        | 113841030          | A             | G                | 0.023           | 0.003        | 2.46E-04               | -0.034       | 0.014        | -0.035       | 0.014        |
| rs1047891        | 2        | 211540507          | A             | C                | 0.023           | 0.003        | 2.36E-04               | 0.008        | 0.015        | 0.004        | 0.015        |
| rs6731997        | 2        | 232560411          | G             | A                | 0.017           | 0.003        | 9.89E-05               | 0.020        | 0.017        | 0.028        | 0.017        |
| rs4973588        | 2        | 233834975          | A             | G                | 0.035           | 0.004        | 2.97E-04               | 0.002        | 0.019        | 0.018        | 0.019        |
| <b>rs6431625</b> | <b>2</b> | <b>234637912</b>   | <b>C</b>      | <b>T</b>         | <b>0.598</b>    | <b>0.002</b> | <b>0.169</b>           | <b>0.038</b> | <b>0.014</b> | <b>0.005</b> | <b>0.014</b> |
| rs10929023       | 2        | 235169902          | G             | A                | 0.023           | 0.003        | 2.14E-04               | 0.011        | 0.015        | -0.002       | 0.015        |
| rs2267846        | 3        | 48556339           | A             | G                | 0.017           | 0.003        | 1.08E-04               | 0.005        | 0.018        | 0.016        | 0.018        |
| rs9826148        | 3        | 114464858          | C             | T                | 0.026           | 0.004        | 1.28E-04               | 0.046        | 0.021        | -0.006       | 0.021        |
| rs6779903        | 3        | 135720851          | T             | G                | 0.019           | 0.003        | 1.44E-04               | -0.011       | 0.015        | -0.029       | 0.015        |
| rs1052618        | 3        | 136574501          | A             | G                | 0.028           | 0.003        | 3.45E-04               | -0.012       | 0.015        | -0.010       | 0.015        |

|             |   |           |   |   |       |       |          |        |       |        |       |
|-------------|---|-----------|---|---|-------|-------|----------|--------|-------|--------|-------|
| rs1482852   | 3 | 156798294 | A | G | 0.017 | 0.003 | 1.32E-04 | 0.006  | 0.014 | 0.001  | 0.014 |
| rs61791066  | 3 | 170713380 | C | T | 0.031 | 0.004 | 2.06E-04 | -0.031 | 0.020 | -0.030 | 0.020 |
| rs11917973  | 3 | 195838613 | T | C | 0.014 | 0.003 | 9.48E-05 | -0.025 | 0.015 | 0.018  | 0.014 |
| rs13092376  | 3 | 196516288 | C | A | 0.014 | 0.003 | 9.51E-05 | 0.022  | 0.014 | 0.006  | 0.014 |
| rs115558925 | 4 | 69765782  | A | C | 0.029 | 0.004 | 1.55E-04 | -0.039 | 0.025 | 0.028  | 0.025 |
| rs151450    | 4 | 88016514  | G | A | 0.017 | 0.003 | 1.45E-04 | -0.009 | 0.014 | -0.024 | 0.014 |
| rs1126673   | 4 | 100045616 | C | T | 0.020 | 0.003 | 1.66E-04 | 0.015  | 0.015 | -0.019 | 0.015 |
| rs79800919  | 4 | 124787383 | G | A | 0.026 | 0.004 | 1.36E-04 | 0.030  | 0.021 | 0.006  | 0.021 |
| rs11727331  | 4 | 145091680 | A | G | 0.040 | 0.006 | 1.55E-04 | 0.032  | 0.032 | 0.035  | 0.032 |
| rs10003923  | 4 | 175086079 | C | T | 0.015 | 0.003 | 1.14E-04 | 0.006  | 0.014 | -0.007 | 0.014 |
| rs6869704   | 5 | 122833667 | T | C | 0.017 | 0.003 | 1.37E-04 | -0.001 | 0.014 | -0.004 | 0.014 |
| rs274555    | 5 | 131722951 | C | T | 0.018 | 0.003 | 1.51E-04 | -0.001 | 0.014 | 0.021  | 0.014 |
| rs12515233  | 5 | 158417109 | C | A | 0.019 | 0.003 | 1.05E-04 | -0.007 | 0.018 | -0.025 | 0.018 |
| rs72835688  | 6 | 12811955  | C | T | 0.030 | 0.005 | 1.02E-04 | 0.005  | 0.032 | 0.001  | 0.032 |
| rs9379764   | 6 | 25414023  | G | T | 0.018 | 0.003 | 1.23E-04 | -0.003 | 0.016 | 0.012  | 0.016 |
| rs198851    | 6 | 26104632  | T | G | 0.047 | 0.003 | 5.59E-04 | -0.011 | 0.019 | 0.010  | 0.019 |
| rs200484    | 6 | 27775674  | A | G | 0.023 | 0.004 | 1.23E-04 | -0.030 | 0.023 | -0.064 | 0.023 |
| rs853684    | 6 | 28294550  | T | C | 0.024 | 0.003 | 2.84E-04 | -0.006 | 0.014 | -0.003 | 0.014 |
| rs9267488   | 6 | 31514247  | A | G | 0.022 | 0.004 | 1.22E-04 | -0.053 | 0.023 | -0.039 | 0.022 |
| rs2395943   | 6 | 42940673  | A | G | 0.020 | 0.003 | 1.93E-04 | -0.006 | 0.014 | -0.004 | 0.014 |
| rs12210538  | 6 | 110760008 | G | A | 0.017 | 0.003 | 9.99E-05 | 0.003  | 0.016 | -0.004 | 0.016 |
| rs1490384   | 6 | 126851160 | C | T | 0.019 | 0.003 | 1.79E-04 | 0.024  | 0.014 | 0.016  | 0.014 |
| rs11753995  | 6 | 160575366 | G | A | 0.025 | 0.003 | 1.71E-04 | -0.006 | 0.019 | 0.026  | 0.019 |
| rs4410790   | 7 | 17284577  | T | C | 0.031 | 0.003 | 4.43E-04 | -0.022 | 0.014 | -0.017 | 0.014 |
| rs55696093  | 7 | 21605973  | G | A | 0.026 | 0.003 | 2.31E-04 | -0.018 | 0.017 | 0.022  | 0.017 |
| rs57720904  | 7 | 28180099  | C | T | 0.030 | 0.005 | 1.36E-04 | -0.007 | 0.021 | 0.005  | 0.022 |
| rs58699591  | 7 | 97876704  | C | T | 0.023 | 0.003 | 1.39E-04 | 0.008  | 0.019 | 0.002  | 0.019 |
| rs33963055  | 8 | 23407178  | T | C | 0.019 | 0.003 | 1.07E-04 | 0.002  | 0.018 | 0.002  | 0.018 |
| rs34664882  | 8 | 41543675  | A | G | 0.076 | 0.007 | 3.85E-04 | 0.018  | 0.044 | 0.066  | 0.044 |

Additional file 1, Seyed Khoei et al.

|            |    |           |   |   |       |       |          |        |       |        |       |
|------------|----|-----------|---|---|-------|-------|----------|--------|-------|--------|-------|
| rs2923430  | 8  | 42391195  | C | T | 0.018 | 0.003 | 1.57E-04 | -0.010 | 0.014 | -0.011 | 0.014 |
| rs8192870  | 8  | 59412066  | T | G | 0.015 | 0.003 | 9.94E-05 | -0.040 | 0.014 | 0.003  | 0.014 |
| rs6986601  | 8  | 131026260 | G | A | 0.014 | 0.003 | 9.66E-05 | -0.026 | 0.014 | -0.013 | 0.014 |
| rs79170239 | 9  | 94044272  | T | C | 0.035 | 0.003 | 3.78E-04 | -0.019 | 0.017 | -0.036 | 0.017 |
| rs3118753  | 9  | 97051962  | C | T | 0.014 | 0.003 | 9.68E-05 | -0.028 | 0.014 | 0.011  | 0.014 |
| rs2519093  | 9  | 136141870 | C | T | 0.024 | 0.003 | 1.76E-04 | -0.024 | 0.016 | -0.007 | 0.017 |
| rs34755157 | 9  | 137113606 | C | T | 0.023 | 0.003 | 1.52E-04 | 0.049  | 0.018 | 0.004  | 0.018 |
| rs10761756 | 10 | 65172328  | C | T | 0.040 | 0.003 | 7.81E-04 | 0.001  | 0.014 | -0.014 | 0.014 |
| rs17476364 | 10 | 71094504  | C | T | 0.091 | 0.004 | 1.64E-03 | -0.026 | 0.024 | -0.006 | 0.024 |
| rs2901610  | 10 | 94536864  | C | T | 0.022 | 0.003 | 2.47E-04 | -0.005 | 0.014 | 0.031  | 0.014 |
| rs12768009 | 10 | 96525865  | G | A | 0.024 | 0.004 | 1.46E-04 | -0.012 | 0.019 | -0.015 | 0.019 |
| rs2792751  | 10 | 113940329 | T | C | 0.021 | 0.003 | 1.81E-04 | -0.009 | 0.015 | -0.025 | 0.015 |
| rs2245095  | 10 | 122857596 | C | T | 0.048 | 0.004 | 3.65E-04 | -0.019 | 0.023 | -0.010 | 0.023 |
| rs11601507 | 11 | 5701074   | A | C | 0.028 | 0.005 | 1.03E-04 | -0.027 | 0.026 | 0.017  | 0.026 |
| rs10832027 | 11 | 13357183  | G | A | 0.024 | 0.003 | 2.48E-04 | 0.004  | 0.014 | 0.010  | 0.014 |
| rs174554   | 11 | 61579463  | A | G | 0.021 | 0.003 | 2.02E-04 | 0.068  | 0.015 | 0.067  | 0.015 |
| rs499974   | 11 | 75455021  | A | C | 0.029 | 0.003 | 2.18E-04 | -0.001 | 0.018 | 0.007  | 0.018 |
| rs717662   | 11 | 100493995 | T | C | 0.026 | 0.004 | 1.34E-04 | 0.034  | 0.021 | 0.000  | 0.021 |
| rs3741298  | 11 | 116657561 | C | T | 0.032 | 0.003 | 3.11E-04 | 0.023  | 0.017 | 0.009  | 0.017 |
| rs76895963 | 12 | 4384844   | G | T | 0.062 | 0.010 | 1.54E-04 | 0.232  | 0.056 | 0.008  | 0.056 |
| rs73080739 | 12 | 20761863  | G | A | 0.033 | 0.004 | 1.91E-04 | -0.049 | 0.022 | -0.028 | 0.022 |
| rs4149056  | 12 | 21331549  | C | T | 0.183 | 0.003 | 8.57E-03 | -0.007 | 0.018 | -0.001 | 0.018 |
| rs1283809  | 12 | 21980618  | C | T | 0.021 | 0.003 | 1.16E-04 | 0.013  | 0.018 | -0.006 | 0.018 |
| rs36124182 | 12 | 24214934  | A | G | 0.049 | 0.007 | 1.68E-04 | -0.002 | 0.033 | -0.007 | 0.033 |
| rs4760682  | 12 | 48512285  | C | A | 0.017 | 0.003 | 9.22E-05 | -0.044 | 0.019 | -0.007 | 0.019 |
| rs10876376 | 12 | 53261822  | A | G | 0.016 | 0.003 | 1.31E-04 | -0.011 | 0.014 | -0.004 | 0.014 |
| rs2657879  | 12 | 56865338  | G | A | 0.018 | 0.003 | 9.46E-05 | -0.001 | 0.017 | -0.013 | 0.018 |
| rs3184504  | 12 | 111884608 | T | C | 0.038 | 0.003 | 7.25E-04 | -0.071 | 0.014 | -0.070 | 0.014 |
| rs12811045 | 12 | 115527503 | A | G | 0.017 | 0.003 | 9.89E-05 | 0.008  | 0.017 | 0.017  | 0.017 |

Additional file 1, Seyed Khoei et al.

|             |    |           |   |   |       |       |          |        |       |        |       |
|-------------|----|-----------|---|---|-------|-------|----------|--------|-------|--------|-------|
| rs7135337   | 12 | 121404155 | C | A | 0.016 | 0.003 | 1.20E-04 | -0.009 | 0.014 | -0.020 | 0.014 |
| rs139763750 | 14 | 51049397  | A | G | 0.038 | 0.006 | 1.45E-04 | -0.020 | 0.032 | -0.044 | 0.032 |
| rs61984409  | 14 | 64730021  | A | C | 0.015 | 0.003 | 9.73E-05 | 0.020  | 0.014 | 0.026  | 0.014 |
| rs339969    | 15 | 60883281  | C | A | 0.026 | 0.003 | 3.20E-04 | -0.051 | 0.014 | 0.009  | 0.014 |
| rs17184256  | 15 | 63785421  | G | A | 0.022 | 0.003 | 2.14E-04 | 0.037  | 0.015 | 0.014  | 0.015 |
| rs67257650  | 15 | 73979507  | T | C | 0.017 | 0.003 | 1.42E-04 | -0.028 | 0.014 | -0.029 | 0.014 |
| rs181207    | 16 | 28513530  | C | T | 0.020 | 0.003 | 1.76E-04 | 0.000  | 0.015 | -0.021 | 0.015 |
| rs4575545   | 16 | 79755446  | G | A | 0.017 | 0.003 | 1.22E-04 | 0.055  | 0.015 | -0.013 | 0.015 |
| rs7185774   | 16 | 81249927  | C | T | 0.015 | 0.003 | 9.57E-05 | 0.012  | 0.014 | -0.004 | 0.014 |
| rs247827    | 16 | 84582825  | G | A | 0.019 | 0.003 | 1.10E-04 | -0.022 | 0.018 | -0.002 | 0.018 |
| rs2968478   | 16 | 88858646  | T | G | 0.023 | 0.003 | 2.60E-04 | -0.008 | 0.014 | 0.005  | 0.014 |
| rs7222046   | 17 | 7806529   | G | A | 0.017 | 0.003 | 1.34E-04 | -0.032 | 0.014 | -0.017 | 0.014 |
| rs1045599   | 17 | 15879910  | C | T | 0.016 | 0.003 | 1.24E-04 | 0.017  | 0.014 | -0.010 | 0.014 |
| rs7213285   | 17 | 27206029  | A | G | 0.020 | 0.003 | 1.07E-04 | 0.000  | 0.019 | -0.003 | 0.019 |
| rs1477141   | 17 | 53361838  | G | T | 0.014 | 0.003 | 1.03E-04 | -0.007 | 0.014 | 0.015  | 0.014 |
| rs764424    | 17 | 57505604  | G | A | 0.015 | 0.003 | 1.12E-04 | 0.005  | 0.014 | 0.005  | 0.014 |
| rs11079420  | 17 | 59253051  | A | G | 0.020 | 0.003 | 1.33E-04 | 0.032  | 0.016 | 0.043  | 0.016 |
| rs7223257   | 17 | 61787684  | T | C | 0.017 | 0.003 | 1.33E-04 | -0.013 | 0.015 | -0.001 | 0.015 |
| rs12601919  | 17 | 65825374  | A | G | 0.021 | 0.003 | 1.35E-04 | -0.001 | 0.017 | -0.017 | 0.017 |
| rs2909210   | 17 | 66456481  | T | G | 0.015 | 0.003 | 1.17E-04 | 0.016  | 0.014 | 0.018  | 0.014 |
| rs1135688   | 17 | 73827205  | C | T | 0.015 | 0.003 | 9.06E-05 | -0.023 | 0.015 | 0.017  | 0.015 |
| rs379149    | 17 | 76126586  | C | T | 0.027 | 0.004 | 1.54E-04 | -0.010 | 0.024 | 0.013  | 0.023 |
| rs112896133 | 19 | 12429782  | G | A | 0.078 | 0.011 | 1.55E-04 | -0.038 | 0.070 | 0.144  | 0.069 |
| rs12609744  | 19 | 12994140  | T | C | 0.016 | 0.003 | 1.10E-04 | 0.008  | 0.016 | -0.013 | 0.016 |
| rs59616136  | 19 | 17252041  | A | G | 0.036 | 0.004 | 2.15E-04 | 0.014  | 0.023 | 0.013  | 0.023 |
| rs58542926  | 19 | 19379549  | T | C | 0.041 | 0.005 | 2.34E-04 | -0.018 | 0.026 | 0.021  | 0.026 |
| rs157595    | 19 | 45425460  | G | A | 0.017 | 0.003 | 1.31E-04 | -0.008 | 0.014 | 0.018  | 0.014 |
| rs676388    | 19 | 49211969  | C | T | 0.021 | 0.003 | 2.29E-04 | -0.003 | 0.014 | 0.024  | 0.014 |
| rs12459419  | 19 | 51728477  | T | C | 0.015 | 0.003 | 9.91E-05 | 0.005  | 0.015 | -0.011 | 0.015 |

|             |    |          |   |   |       |       |          |        |       |        |       |
|-------------|----|----------|---|---|-------|-------|----------|--------|-------|--------|-------|
| rs117113213 | 20 | 39165692 | G | A | 0.046 | 0.007 | 1.32E-04 | 0.033  | 0.043 | 0.029  | 0.044 |
| rs6129760   | 20 | 39746403 | G | A | 0.018 | 0.003 | 1.37E-04 | -0.002 | 0.015 | 0.007  | 0.015 |
| rs1800961   | 20 | 43042364 | T | C | 0.062 | 0.007 | 2.38E-04 | -0.027 | 0.040 | -0.069 | 0.041 |
| rs4820091   | 22 | 21940189 | T | G | 0.018 | 0.003 | 9.78E-05 | -0.007 | 0.017 | 0.054  | 0.017 |
| rs855791    | 22 | 37462936 | G | A | 0.028 | 0.003 | 3.94E-04 | 0.022  | 0.014 | 0.013  | 0.014 |
| rs738408    | 22 | 44324730 | T | C | 0.019 | 0.003 | 1.19E-04 | 0.001  | 0.016 | 0.010  | 0.016 |

Abbreviations: Chr: chromosome, SE: standard error

Position in Genome Reference Consortium Human Build 37 (GRCh37). Effect and standard error of inverse-normal-transformed bilirubin levels. Total bilirubin can be regarded as the sum of conjugated and unconjugated bilirubin (UCB).

The main SNP (rs6431625) is in strong linkage equilibrium with a homozygous insertion of TA pairs (genotype *UGT1A1*\*28/\*28) in the *UGT1A1* gene promoter. *UGT1A1* glucuronidates bilirubin in the liver and results in the formation of bilirubin mono- and di-glucuronide which are excreted into bile. This polymorphism results in reduced bilirubin glucuronidation activity and leads to hereditary unconjugated hyperbilirubinemia.

**Supplementary Table 2 | Participating studies in the genetic consortia (GECCO/ CCFR/ and CORECT)**

| <b>Study</b>        | <b>n total</b> | <b>n cases</b> | <b>n controls</b> | <b>n men (cases/controls)</b> | <b>n women (cases/controls)</b> |
|---------------------|----------------|----------------|-------------------|-------------------------------|---------------------------------|
| ASTERISK            | 1839           | 892            | 947               | 552/524                       | 340/423                         |
| ATBC                | 177            | 147            | 30                | 147/30                        | 0/0                             |
| CCFR_1              | 2014           | 1036           | 978               | 536/469                       | 500/509                         |
| CCFR_2              | 716            | 331            | 385               | 152/176                       | 179/209                         |
| CCFR_3              | 1851           | 1190           | 661               | 582/303                       | 608/358                         |
| CCFR_4              | 2124           | 1590           | 534               | 956/287                       | 634/247                         |
| CLUEII              | 518            | 258            | 260               | 121/119                       | 137/141                         |
| COLO2&3             | 211            | 87             | 124               | 47/70                         | 40/54                           |
| COLOCARE_HEIDELBERG | 223            | 187            | 36                | 124/17                        | 63/19                           |
| COLOCARE_SEATTLE    | 169            | 169            | 0                 | 96/0                          | 73/0                            |
| COLON               | 1335           | 643            | 692               | 408/436                       | 235/256                         |
| CORSA_1             | 2234           | 1460           | 774               | 915/442                       | 545/332                         |
| CORSA_2             | 2483           | 1210           | 1273              | 784/822                       | 426/451                         |
| CPSII_1             | 1076           | 540            | 536               | 272/276                       | 268/260                         |
| CPSII_2             | 688            | 339            | 349               | 163/165                       | 176/184                         |
| CRCGEN              | 1546           | 760            | 786               | 491/420                       | 269/366                         |
| CZECH               | 3293           | 1675           | 1618              | 1051/883                      | 624/735                         |
| DACHS_1             | 3409           | 1707           | 1702              | 999/1017                      | 708/685                         |
| DACHS_2             | 1164           | 666            | 498               | 406/323                       | 260/175                         |
| DACHS_3             | 1827           | 1210           | 617               | 754/375                       | 456/242                         |
| DALS_1              | 1411           | 702            | 709               | 399/400                       | 303/309                         |
| DALS_2              | 863            | 402            | 461               | 212/241                       | 190/220                         |
| EDRN                | 589            | 273            | 316               | 166/155                       | 107/161                         |
| EPIC                | 4401           | 2095           | 2306              | 979/1074                      | 1116/1232                       |
| EPICOLON            | 609            | 267            | 342               | 157/201                       | 110/141                         |
| ESTHER_VERDI        | 817            | 397            | 420               | 261/273                       | 136/147                         |

Additional file 1, Seyed Khoei et al.

|              |      |      |      |          |           |
|--------------|------|------|------|----------|-----------|
| HAWAIICCS_AD | 628  | 85   | 543  | 49/352   | 36/191    |
| HCES-CRC     | 5294 | 3026 | 2268 | 1960/909 | 1066/1359 |
| HPFS_1       | 455  | 227  | 228  | 227/228  | 0/0       |
| HPFS_2       | 348  | 176  | 172  | 176/172  | 0/0       |
| HPFS_3_AD    | 655  | 312  | 343  | 312/343  | 0/0       |
| HPFS_4       | 380  | 183  | 197  | 183/197  | 0/0       |
| HPFS_5_AD    | 260  | 155  | 105  | 155/105  | 0/0       |
| KENTUCKY     | 2167 | 1035 | 1132 | 511/559  | 524/573   |
| LCCS         | 2183 | 1482 | 701  | 884/330  | 598/371   |
| MCCS         | 1343 | 709  | 634  | 366/325  | 343/309   |
| MEC_1        | 672  | 326  | 346  | 178/183  | 148/163   |
| MEC_2        | 144  | 63   | 81   | 28/43    | 35/38     |
| MECC_1       | 978  | 483  | 495  | 265/262  | 218/233   |
| MECC_2       | 1901 | 1093 | 808  | 544/406  | 549/402   |
| MECC_3       | 4380 | 2570 | 1810 | 1395/970 | 1175/840  |
| MSKCC        | 68   | 68   | 0    | 27/0     | 41/0      |
| NCCCSI       | 720  | 251  | 469  | 140/264  | 111/205   |
| NCCCSII      | 1281 | 595  | 686  | 354/427  | 241/259   |
| NFCCR        | 660  | 193  | 467  | 120/270  | 73/197    |
| NGCCS        | 1103 | 1103 | 0    | 621/0    | 482/0     |
| NHS_1        | 1165 | 391  | 774  | 0/0      | 391/774   |
| NHS_2        | 339  | 158  | 181  | 0/0      | 158/181   |
| NHS_3_AD     | 1090 | 513  | 577  | 0/0      | 513/577   |
| NHS_4        | 611  | 308  | 303  | 0/0      | 308/303   |
| NHS_5_AD     | 477  | 251  | 226  | 0/0      | 251/226   |
| NHSII        | 167  | 87   | 80   | 0/0      | 87/80     |
| NSHDS        | 829  | 416  | 413  | 149/148  | 267/265   |
| OFCCR        | 1116 | 594  | 522  | 242/295  | 352/227   |
| OSUMC        | 5527 | 3094 | 2433 | 1666/961 | 1428/1472 |



|              |               |               |               |                      |                      |
|--------------|---------------|---------------|---------------|----------------------|----------------------|
| PHS          | 764           | 375           | 389           | 375/389              | 0/0                  |
| PLCO_1       | 2496          | 524           | 1972          | 296/1536             | 228/436              |
| PLCO_2       | 889           | 475           | 414           | 271/239              | 204/175              |
| PLCO_4_AD    | 2105          | 797           | 1308          | 460/571              | 337/737              |
| PMH-CCFR     | 398           | 276           | 122           | 0/0                  | 276/122              |
| SEARCH       | 4288          | 4173          | 115           | 2384/69              | 1789/46              |
| SELECT       | 533           | 264           | 269           | 264/269              | 0/0                  |
| SLRCCS       | 4785          | 2504          | 2281          | 1369/1196            | 1135/1085            |
| SMC_COSM     | 1397          | 566           | 831           | 331/483              | 235/348              |
| SMS_AD       | 171           | 41            | 130           | 25/57                | 16/73                |
| USC_HRT_CRC  | 708           | 321           | 387           | 0/0                  | 321/387              |
| VITAL        | 565           | 279           | 286           | 150/148              | 129/138              |
| WHI_1        | 1991          | 468           | 1523          | 0/0                  | 468/1523             |
| WHI_2        | 1984          | 978           | 1006          | 0/0                  | 978/1006             |
| WHI_3        | 1113          | 554           | 559           | 0/0                  | 554/559              |
| <b>TOTAL</b> | <b>98,715</b> | <b>52,755</b> | <b>45,940</b> | <b>28,270/22,204</b> | <b>24,568/23,736</b> |

Abbreviations: ASTERISK: Association Study Evaluating RISK for Sporadic Colorectal Cancer; CCFR: Colon Cancer Family Registry; CCFR: Colon Cancer Family Registry; Colo 2&3: a case-control study from the University of Hawai'i; DACHS: Darmkrebs: Chancen der Verhütung durch Screening Study; DALIS: Diet, Activity and Lifestyle Study; GECCO: Genetics and Epidemiology of Colorectal Cancer Consortium; HPFS: Health Professionals Follow-up Study; MEC: Multiethnic Cohort; NHS: Nurses' Health Study; OFCCR: Ontario Familial Colorectal Cancer Registry; PHS: Physicians' Health Study; PLCO: Prostate, Lung, Colorectal and Ovarian Cancer Screening Trial; PMH: Postmenopausal Hormone Study; VITAL: Vitamins and Lifestyle Study; Women's Health Initiative; CPSII: Cancer Society Cancer Prevention Study II; MECC: Molecular Epidemiology of Colorectal Cancer Study; MCCS: Melbourne Case-Control Study (in Melbourne Collaborative Cohort); NFCCR: Newfoundland Case-Control Study; SEARCH: Studies of Epidemiology and Risk Factors in Cancer Heredity; SWEDEN\_Wolk: The Cohort of Swedish Men and the Swedish Mammography Cohort; ATBC: Alpha-Tocopherol, Beta-Carotene Cancer Prevention; ColoCare\_heidelberg: The ColoCare study at the University Hospital Heidelberg; ColoCare\_Seattle: The ColoCare study at the Fred Hutchinson Cancer Research Center; ESTHER\_VERDI: ESTHER/VERDI study in Saarland, Germany; Kiel: Sample collected in PopGen Biobank; MSKCC: Memorial Sloan Kettering (MSK) cohort; NHS2: Nurses' Health Study II; SWEDEN\_Lindblom: The Swedish Low-Risk Colorectal Cancer Study; USC\_HRT\_CRC: a case-control study for HRT use and CRC risk in Los Angeles county. EPIC: European Prospective Investigation into Cancer and Nutrition

### Supplementary Table 3 | The association between unconjugated bilirubin (UCB) levels and colorectal cancer risk after different sensitivity analyses in the EPIC study

| Colorectal cancer         |                      |                         |             |                      |                         |             |
|---------------------------|----------------------|-------------------------|-------------|----------------------|-------------------------|-------------|
| Confounders/<br>mediators | Men                  |                         |             | Women                |                         |             |
|                           | n cases/<br>controls | odds ratio (95% CI)     | P           | n cases/<br>controls | odds ratio (95% CI)     | P           |
| Adjusted Model            | <b>658/658</b>       | <b>1.19 (1.04-1.36)</b> | <b>0.01</b> | <b>728/728</b>       | <b>0.86 (0.76-0.97)</b> | <b>0.02</b> |
| Model S1                  | 452/452              | 1.23 (1.04-1.45)        | 0.02        | 442/442              | 0.95 (0.81-1.11)        | 0.5         |
| Model S2                  | 517/517              | 1.26 (1.08-1.47)        | 0.003       | 570/570              | 0.87 (0.75-1.00)        | 0.05        |
| Model S3                  | 297/297              | 1.26 (1.03-1.55)        | 0.02        | 264/264              | 0.83 (0.68-1.02)        | 0.08        |
| Model S4                  | 655/655              | 1.20 (1.05-1.37)        | 0.01        | 382/382              | 0.91 (0.76-1.08)        | 0.3         |
| Model S5                  | 655/655              | 1.20 (1.05-1.37)        | 0.01        | 727/727              | 0.87 (0.77-0.98)        | 0.02        |
| Model S6                  | 423/423              | 1.11 (0.94-1.31)        | 0.2         | 492/492              | 0.82 (0.70-0.94)        | 0.01        |
| Model S7                  | 619/619              | 1.21 (1.05-1.38)        | 0.01        | 667/667              | 0.87 (0.77-0.99)        | 0.03        |

Abbreviations: n= number, CI: Confidence Interval, P: P-value

EPIC (European Prospective Investigation into Cancer and Nutrition): Conditional logistic regression models were used to estimate odds ratios (OR) and 95% confidence intervals (CI) for association between log-transformed UCB levels (log-UCB), standardized per one standard deviation (1-SD) increments, and CRC risk. Crude model which was conditioned on the matching factors including, study center, age at blood collection (1 year), fasting status and time of blood collection (3 h) at blood collection, among women, additionally by menopausal status (pre-, peri-, post-menopausal or surgically menopausal), and hormone therapy (HT) (yes, no) at time of blood collection. Multivariable model adjusted for level of education (none/primary school, technical/professional, secondary school, university degree), BMI, height, smoking status (never, former, current smoker), physical activity (inactive, moderately inactive, moderately active, active), alcohol consumption (g/d), dietary intakes of fiber (g/d), red meat (g/d), processed meats (g/d), dairy products (g/d), total energy intake (kcal/d).

Spearman partial correlation coefficients (adjustment for age, fasting status and study center) were calculated in control participants to assess the correlations between baseline log-UCB concentrations, lipid and sugar metabolism (TG, HDL, LDL, Chol, apo A, apo B, HbA1c, C-peptide), oxidative stress biomarkers (reactive oxygen metabolites, ROM and FRAP), inflammatory indicator (hsCRP, adiponectin, leptin), insulin-like growth factor 1 (IGF1) and IGF binding proteins (IGF-BP) (3), dietary factors. Variables with P< 0.1 considered as potential confounders/mediators in this tables.

Model S1 Excluding participants with chronic disease (diabetes and CVD) at baseline

Model S2 Excluding participants with lower than 2 years of follow-up

Model S3 Adjusting for lipid metabolism (TG) and sugar metabolism (HbA1c and c-peptide),

Model S4 Adjusting for oxidative stress (ROM), IGF1 and IGF-BP, for inflammatory indicator (leptin and CRP)

Model S5 Adjusting for dietary factors: fruit, vegetable, rice/pasta/other grains, and coffee/tea/herbal tea

Model S6 Adjusting for endotoxins (lipopolysaccharide IgG and lipopolysaccharide IgA)

Model S7 Excluding missing values in main covariates

The impact of liver function on bilirubin levels is important to assess. We had access to the Biocrates data on these subjects, therefore, we could envision adjusting for liver function using the Fischer Ratio (the molar concentration ratio of BCAAs/AAAs: branched chain amino acids (BCAAs): leucine, valine, isoleucine/aromatic amino acids (AAAs): phenylalanine, tyrosine) and BTR (Branched-chain amino-acids to Tyrosine Ratio). The normal range of Fischer's ratio is between 3.0 and 4.2 and normal range of BTR is between 5.71-9.42 in healthy individuals. Both indexes decrease with increasing severity of hepatic damage and are important for assessing liver metabolism, hepatic functional reserve and the severity of liver dysfunction. They could help for excluding those subjects having liver disease, therefore, we could be sure that participants who had higher UCB suffered not from liver problems. After considering both indexes in our data, nobody had known liver disease.

**Supplementary Table 4 | Results for the Mendelian randomization sensitivity analyses**

|                   |                |       | Likelihood-based method |         |                  | Inverse-variance weighted method* |      | Weigthed median approach |      | Modal-based approach |      | MR-Egger Simex approach |      | MR-Egger intercept approach |        |        |      | MR-PRESSO approach  |                         |              |
|-------------------|----------------|-------|-------------------------|---------|------------------|-----------------------------------|------|--------------------------|------|----------------------|------|-------------------------|------|-----------------------------|--------|--------|------|---------------------|-------------------------|--------------|
| Colorectal cancer | SNP set        | n SNP | odds ratio (95% CI)     | P       | P <sub>het</sub> | odds ratio (95% CI)               | P    | odds ratio (95% CI)      | P    | odds ratio (95% CI)  | P    | odds ratio (95% CI)     | P    | Est                         | LCI    | UCI    | P    | P <sub>Global</sub> | P <sub>Distortion</sub> | Outlier SNPs |
| Men               | All            | 115   | 1.04 (1.00-1.08)        | 0.08    | 3.6E-05          | 1.04 (0.98-1.10)                  | 0.17 | 1.06 (1.02-1.11)         | 0.01 | 1.05 (1.00-1.10)     | 0.03 | 1.07 (1.01-1.13)        | 0.03 | -0.005                      | -0.008 | -0.001 | 0.01 | <1e-04              | -                       | -            |
|                   | rs6431625      | 1     | 1.07 (1.02-1.12)        | 6.3E-03 |                  |                                   |      |                          |      |                      |      |                         |      |                             |        |        |      |                     |                         |              |
|                   | rs6431625 out  | 114   | 0.89 (0.80-1.00)        | 0.05    | 1.5E-04          | 0.90 (0.78-1.03)                  | 0.11 | 0.96 (0.79-1.16)         | 0.67 | 0.92 (0.77-1.10)     | 0.35 | 0.95 (0.74-1.22)        | 0.70 | -0.002                      | -0.007 | 0.003  | 0.45 | 3.0E-04             | -                       | -            |
|                   | Pleiotropy out | 91    | 0.84 (0.72-0.98)        | 0.02    | 3.2E-04          | 0.84 (0.70-1.02)                  | 0.08 | 0.78 (0.61-0.98)         | 0.03 | 0.79 (0.55-1.12)     | 0.18 | 0.91 (0.52-1.60)        | 0.74 | -0.002                      | -0.011 | 0.007  | 0.65 | 2.0E-04             | -                       | -            |
| Women             | All            | 115   | 1.01 (0.97-1.05)        | 0.75    | 0.03             | 1.01 (0.96-1.06)                  | 0.78 | 1.01 (0.96-1.06)         | 0.75 | 1.01 (0.96-1.06)     | 0.75 | 1.01 (0.96-1.06)        | 0.79 | -1.4E-05                    | -0.003 | 0.003  | 0.99 | 0.10                | -                       | -            |
|                   | rs6431625      | 1     | 1.01 (0.96-1.06)        | 0.72    |                  |                                   |      |                          |      |                      |      |                         |      |                             |        |        |      |                     |                         |              |
|                   | rs6431625 out  | 114   | 1.00 (0.89-1.11)        | 0.96    | 0.03             | 1.00 (0.88-1.13)                  | 0.96 | 0.99 (0.83-1.20)         | 0.96 | 1.01 (0.84-1.20)     | 0.93 | 0.98 (0.78-1.22)        | 0.83 | 0.001                       | -0.005 | 0.006  | 0.83 | 0.04                | -                       | -            |
|                   | Pleiotropy out | 91    | 1.01 (0.87-1.17)        | 0.95    | 0.03             | 1.00 (0.85-1.19)                  | 0.96 | 0.94 (0.73-1.21)         | 0.66 | 0.95 (0.65-1.37)     | 0.77 | 0.90 (0.54-1.50)        | 0.69 | 0.002                       | -0.007 | 0.011  | 0.61 | 0.03                | -                       | -            |

Abbreviations: SNP: single nucleotide polymorphism, CI: Confidence Interval, P: P-value, P<sub>het</sub>: P-value for SNP heterogeneity, \*Multiplicative random effects.

### Supplementary Table 5 | Results for the Mendelian randomization sensitivity analyses: positive control outcomes for pancreatic cancer

| Pancreatic cancer | SNP set        | n SNP | Likelihood-based method |      |                      | Weigthed median approach |      | MR-Egger Simex approach |      |
|-------------------|----------------|-------|-------------------------|------|----------------------|--------------------------|------|-------------------------|------|
|                   |                |       | odds ratio (95% CI)     | P    | P <sub>het</sub>     | odds ratio (95% CI)      | P    | odds ratio (95% CI)     | P    |
| <b>Men</b>        | rs6431625      | 1     | 1.06 (0.95-1.18)        | 0.27 |                      |                          |      |                         |      |
|                   | rs6431625 out  | 113   | 0.75 (0.58-0.96)        | 0.02 | 2.50E <sup>-03</sup> | 0.60 (0.39-0.93)         | 0.02 | 0.60 (0.35-1.05)        | 0.07 |
|                   | Pleiotropy out | 91    | 0.89 (0.63-1.27)        | 0.53 | 0.11                 | 0.96 (0.56-1.64)         | 0.89 | 0.89 (0.29-2.73)        | 0.83 |
| <b>Women</b>      | rs6431625      | 1     | 0.98 (0.87-1.10)        | 0.71 |                      |                          |      |                         |      |
|                   | rs6431625 out  | 113   | 0.73 (0.55-0.97)        | 0.03 | 0.01                 | 0.78 (0.49-1.26)         | 0.32 | 0.81 (0.14-1.49)        | 0.49 |
|                   | Pleiotropy out | 91    | 0.81 (0.55-1.20)        | 0.29 | 0.11                 | 0.96 (0.52-1.76)         | 0.90 | 1.44 (0.42-4.97)        | 0.56 |

Abbreviations: SNP: single nucleotide polymorphism, CI: Confidence Interval, P: P-value, P<sub>het</sub>: P-value for SNP heterogeneity  
 Men: n cases= 3861; n controls= 4056; minimum detectable odds ratio *UGT1A1* SNP=1.17/0.86; non-*UGT1A1* SNPs= 1.43/0.70.  
 Women: n cases= 3252; n controls= 3268; minimum detectable odds ratio *UGT1A1* SNP= 1.18/0.84; non-*UGT1A1* SNPs= 1.48/0.67.

References: Pancreatic Cancer Cohort Consortium (PanScan; 12 studies) and the Pancreatic Cancer Case-Control Consortium (PanC4; 10 studies) through the National Center for Biotechnology Information database of Genotypes and Phenotypes (dbGaP; Study Accession: phs000206.v3.p2 and phs000648.v1.p1; project reference #9314).

**Petersen GM, Amundadottir L, Fuchs CS, Kraft P, Stolzenberg-Solomon RZ, Jacobs KB, et al.** A genome-wide association study identifies pancreatic cancer susceptibility loci on chromosomes 13q22.1, 1q32.1 and 5p15.33. *Nature genetics*. 2010;42(3):224-8;

Amundadottir L, Kraft P, Stolzenberg-Solomon RZ, Fuchs CS, Petersen GM, Arslan AA, et al. Genome-wide association study identifies variants in the ABO locus associated with susceptibility to pancreatic cancer. *Nature genetics*. 2009;41(9):986-90.

Childs EJ, Mocchi E, Campa D, Bracci PM, Gallinger S, Goggins M, et al. Common variation at 2p13.3, 3q29, 7p13 and 17q25.1 associated with susceptibility to pancreatic cancer. *Nature genetics*. 2015;47(8):911-6.

### Supplementary Table 6 | Results for genome-wide associations of instruments with other phenotypes

| Trait                                                                                                                                                                           | P         | SNP        |
|---------------------------------------------------------------------------------------------------------------------------------------------------------------------------------|-----------|------------|
| 2-methylbutyrylglycine                                                                                                                                                          | 3.00E-22  | rs1047891  |
| 2-methylbutyrylglycine, 3-methylcrotonylglycine, indoleacetylglutamine, indoleacetylglucine, isobutyrylglycine, isovalerylglutamine, isovalerylglucine, tigloylglycine, X-17688 | 2.00E-16  | rs1047891  |
| 3-hydroxy-3-methylglutarate, 3-methylglutaconate, 3-methylglutarate, 2-methylglutarate, 3-methylglutaryl carnitine                                                              | 8.00E-30  | rs1047891  |
| 3-methylcrotonylglycine                                                                                                                                                         | 4.00E-14  | rs1047891  |
| 3-methylglutaconate                                                                                                                                                             | 3.00E-25  | rs1047891  |
| 3-methylglutarate/2-methylglutarate                                                                                                                                             | 5.00E-26  | rs1047891  |
| 3-methylglutaryl carnitine 2                                                                                                                                                    | 2.00E-21  | rs1047891  |
| Education attainment                                                                                                                                                            | 4.00E-12  | rs1047891  |
| Glycine                                                                                                                                                                         | 1.00E-300 | rs1047891  |
| Hexanoylglycine                                                                                                                                                                 | 9.00E-23  | rs1047891  |
| Hexanoylglycine, isocaproylglycine, X-16567, X-24402                                                                                                                            | 3.00E-24  | rs1047891  |
| Isobutyrylglycine                                                                                                                                                               | 7.00E-18  | rs1047891  |
| Isocaproylglycine                                                                                                                                                               | 1.00E-25  | rs1047891  |
| Isovalerylglucine                                                                                                                                                               | 4.00E-12  | rs1047891  |
| Tigloylglycine                                                                                                                                                                  | 7.00E-17  | rs1047891  |
| X - 16567                                                                                                                                                                       | 3.00E-13  | rs1047891  |
| X - 24402                                                                                                                                                                       | 1.00E-12  | rs1047891  |
| BMI-adjusted                                                                                                                                                                    | 3.00E-08  | rs10832027 |
| Education attainment                                                                                                                                                            | 1.00E-15  | rs11753995 |
| Acetylcarnitine                                                                                                                                                                 | 8.00E-29  | rs12210538 |
| Acylcarnitine total                                                                                                                                                             | 7.00E-37  | rs12210538 |
| Carnitine free                                                                                                                                                                  | 6.00E-25  | rs12210538 |
| Leucine   Isoleucine / Propionylcarnitine                                                                                                                                       | 2.00E-26  | rs12210538 |
| Octadecadienylcarnitine                                                                                                                                                         | 5.00E-21  | rs12210538 |
| Palmitoylcarnitine                                                                                                                                                              | 7.00E-31  | rs12210538 |
| Propionylcarnitine                                                                                                                                                              | 3.00E-25  | rs12210538 |
| Myeloid cell surface antigen CD33                                                                                                                                               | 3.00E-165 | rs12459419 |
| Education attainment                                                                                                                                                            | 2.00E-12  | rs1482852  |
| BMI-adjusted                                                                                                                                                                    | 5.00E-12  | rs1490384  |
| Total brain volume                                                                                                                                                              | 2.00E-15  | rs1490384  |
| Education attainment                                                                                                                                                            | 6.00E-49  | rs174554   |
| Phosphatidylcholine with diacyl residue sum C38:3/Phosphatidylcholine with acyl-alkyl residue sum C40:1                                                                         | 3.00E-17  | rs174554   |
| Education attainment                                                                                                                                                            | 1.00E-16  | rs17513135 |
| BMI-adjusted                                                                                                                                                                    | 6.00E-19  | rs1800961  |
| Education attainment                                                                                                                                                            | 5.00E-23  | rs1800961  |
| Education attainment                                                                                                                                                            | 3.00E-33  | rs198851   |
| Adhesion G protein-coupled receptor F5, ADGRF5.6409.57.3                                                                                                                        | 1.00E-155 | rs2519093  |
| C1GALT1-specific chaperone 1, C1GALT1C1.5735.54.3                                                                                                                               | 2.00E-89  | rs2519093  |

|                                                                                    |           |            |
|------------------------------------------------------------------------------------|-----------|------------|
| D-glucuronyl C5-epimerase, GLCE.7808.5.3                                           | 1.00E-78  | rs2519093  |
| Education attainment                                                               | 2.00E-48  | rs2519093  |
| E-selectin, SELE.3470.1.2                                                          | 0         | rs2519093  |
| Interleukin-3 receptor subunit alpha, IL3RA.13744.37.3                             | 8.00E-198 | rs2519093  |
| N-acetyllactosaminide beta-1,3-N-acetylglucosaminyltransferase 2, B3GNT2.7980.72.3 | 4.00E-23  | rs2519093  |
| Protein FAM3B, FAM3B.9177.6.3                                                      | 3.00E-20  | rs2519093  |
| P-selectin, SELP.4154.57.2                                                         | 4.00E-48  | rs2519093  |
| Thrombospondin type-1 domain-containing protein 1, THSD1.5621.64.3                 | 3.00E-19  | rs2519093  |
| Vascular endothelial growth factor receptor 3, FLT4.2358.19.2                      | 6.00E-80  | rs2519093  |
| Glutamine                                                                          | 3.00E-70  | rs2657879  |
| Education attainment                                                               | 1.00E-09  | rs3184504  |
| Kynurenine                                                                         | 6.00E-18  | rs3184504  |
| Vascular cell adhesion protein 1, VCAM1.2967.8.1                                   | 2.00E-14  | rs3184504  |
| Education attainment                                                               | 5.00E-268 | rs3741298  |
| Triglyceride                                                                       | 3.00E-08  | rs3741298  |
| 1-arachidonoylglycerophosphoethanolamine                                           | 3.00E-18  | rs4149056  |
| 4-androsten-3beta,17beta-diol disulfate 2                                          | 1.00E-18  | rs4149056  |
| C18:1-DC                                                                           | 2.00E-13  | rs4149056  |
| C18-DC:C20-OH                                                                      | 2.00E-12  | rs4149056  |
| Glycocholate sulfate                                                               | 4.00E-32  | rs4149056  |
| Isoleucine/X-11529                                                                 | 0         | rs4149056  |
| LPE 20:4                                                                           | 1.00E-10  | rs4149056  |
| X-21470                                                                            | 2.00E-11  | rs4149056  |
| X-11491                                                                            | 3.00E-32  | rs4149056  |
| X-11538                                                                            | 1.00E-37  | rs4149056  |
| X-12063                                                                            | 1.00E-73  | rs4149056  |
| X-12456                                                                            | 8.00E-17  | rs4149056  |
| X-13429                                                                            | 5.00E-22  | rs4149056  |
| Education attainment                                                               | 2.00E-30  | rs4410790  |
| Education attainment                                                               | 7.00E-13  | rs556107   |
| Education attainment                                                               | 4.00E-37  | rs58542926 |
| Vitamin E alpha tocopherol                                                         | 1.00E-08  | rs58542926 |
| BMI-adjusted                                                                       | 2.00E-126 | rs61812598 |
| Interleukin-6 receptor                                                             | 6.00E-63  | rs61812598 |
| BMI-adjusted                                                                       | 6.00E-38  | rs6734238  |
| Education attainment                                                               | 6.00E-19  | rs6734238  |
| Education attainment                                                               | 5.00E-14  | rs855791   |
| hemoglobin concentration                                                           | 2.00E-51  | rs855791   |
| Hemoglobin                                                                         | 3.00E-08  | rs855791   |
| Iron                                                                               | 9.00E-11  | rs855791   |
| Mean corpuscular volume (MCV)                                                      | 1.00E-10  | rs855791   |
| Transferrin receptor protein 1, TFRC.8795.48.3                                     | 2.00E-16  | rs855791   |

### Supplementary Figure 1 | Cubic spline modelling of unconjugated bilirubin (UCB) levels in relation to colorectal cancer risk in the EPIC study

#### A. Colorectal cancer risk in men

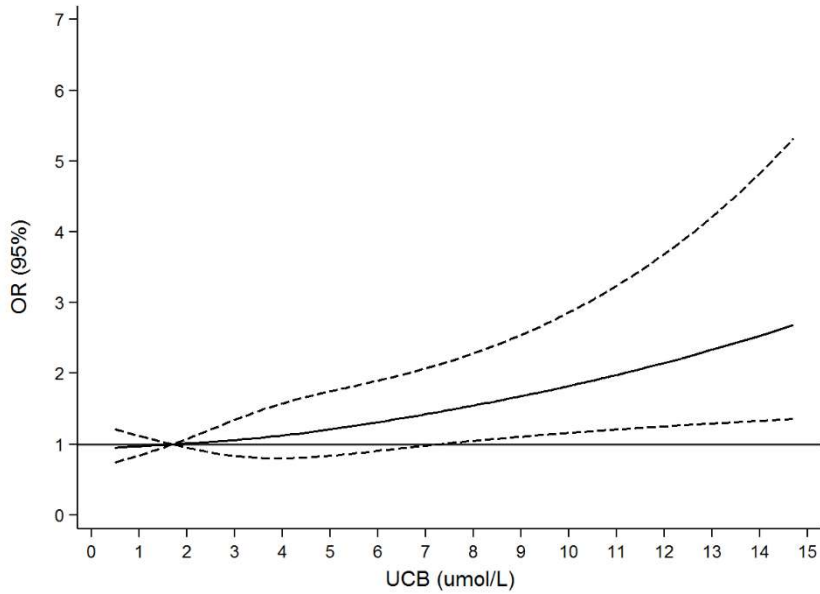

#### B. Colorectal cancer risk in women

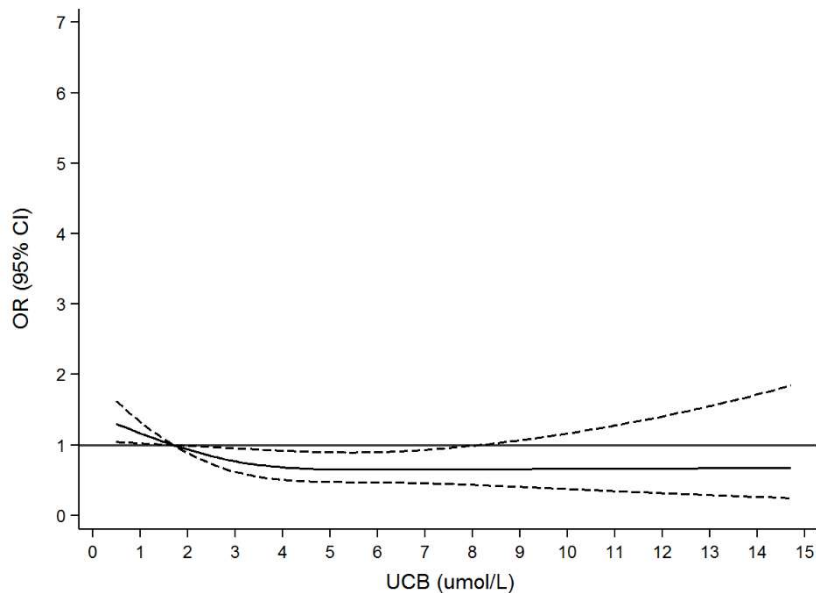

This graph shows multivariable adjusted odds ratio (solid line) with 95% confidence interval (dashed lines) for the association of UCB levels ( $\mu\text{mol/L}$ ) to the incident CRC in the EPIC nested case-control study in men (A) and women (B). It was modeled by restricted cubic splines with 3 knots at percentiles 10<sup>th</sup>, 50<sup>th</sup>, and 90<sup>th</sup> in a logistic regression model to evaluate the linearity hypothesis.

$P_{\text{nonlinearity}}(\text{men}) = 0.7$ ,  $P_{\text{nonlinearity}}(\text{women}) = 0.1$

**Supplementary Figure 2 | Association between *UGT1A1* polymorphism (rs6431625) and unconjugated bilirubin (UCB) levels in the EPIC study (with available GWAS data)**

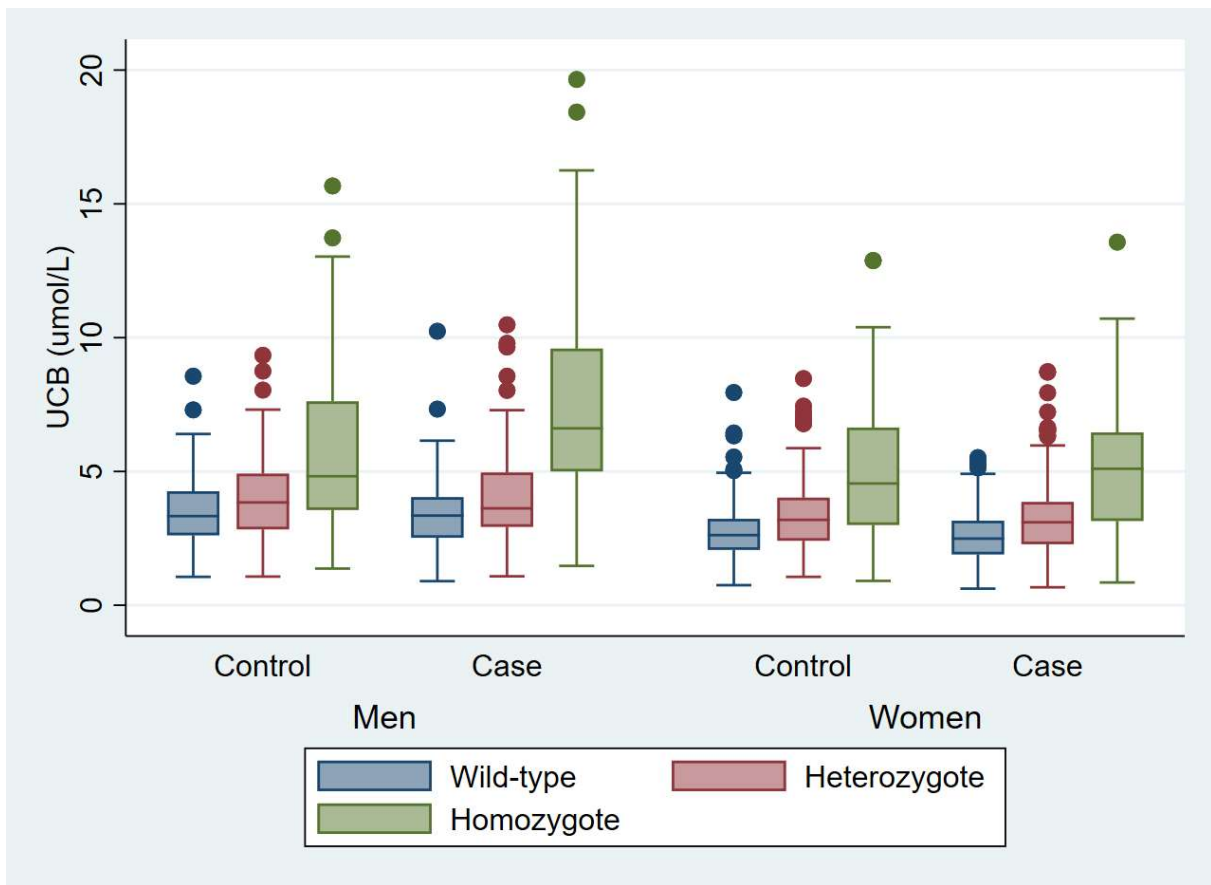

Linear regression (adjusted for sex) were calculated in all controls. We observed significant association between UCB concentrations and rs6431625 ( $R^2= 0.20$ ,  $P< 0.001$ ,  $n$  controls= 808). The comparison between groups statistically analyzed using one-way analyses of variance (ANOVA) to see association between variables.



**Supplementary Figure 3 | Directed acyclic graph (DAG) of the causal structure of associations between unconjugated bilirubin (UCB) levels in relation to colorectal cancer risk in the EPIC study**

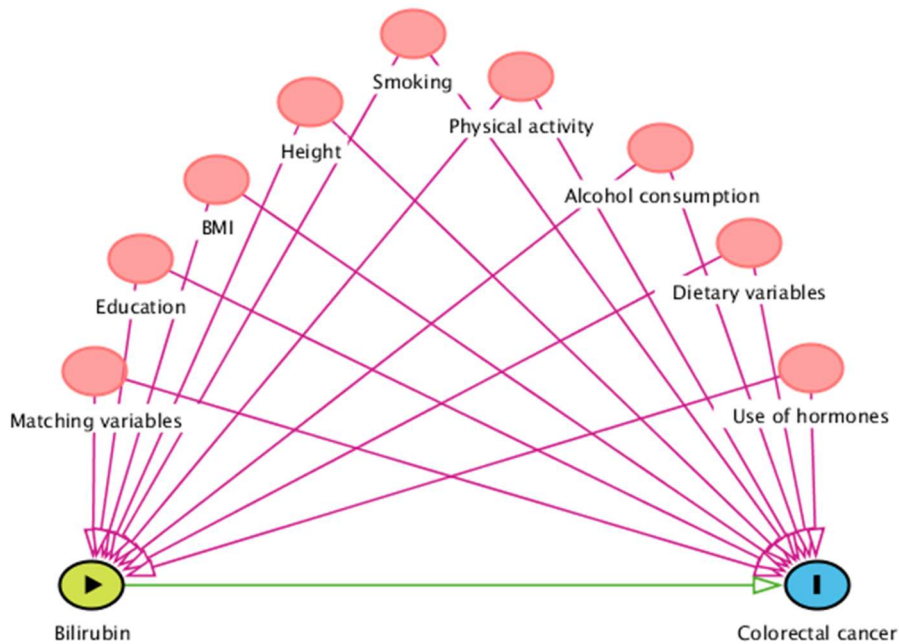

Matching variables: sex, age at blood collection, study center, time of day at blood collection, fasting status, menopausal status, and phase of menstrual cycle at blood collection.

BMI (body mass index) indicating obesity replaced by waist circumference resulted in virtually identical risk associations.

Dietary variables modelled separately: dietary intakes of fiber (g/d), red meat (g/d), processed meats (g/d), dairy products (g/d), and total energy intake (kcal/d).

Reference and software: Johannes Textor, Benito van der Zander, Mark K. Gilthorpe, Maciej Liskiewicz, George T.H. Ellison. Robust causal inference using directed acyclic graphs: the R package 'dagitty'. *International Journal of Epidemiology* 45(6):1887-1894, 2016.

## **Supplementary Text 1: Specific funding sources and acknowledgements of participating studies**

### **Study-specific funding sources**

Genetics and Epidemiology of Colorectal Cancer Consortium (GECCO): National Cancer Institute, National Institutes of Health, U.S. Department of Health and Human Services (U01 CA164930, U01 CA137088, R01 CA059045, U01 CA164930, R01201407).

Genotyping/Sequencing services were provided by the Center for Inherited Disease Research (CIDR) (X01-HG008596 and X-01-HG007585). CIDR is fully funded through a federal contract from the National Institutes of Health to The Johns Hopkins University, contract number HHSN268201200008I. This research was funded in part through the NIH/NCI Cancer Center Support Grant P30 CA015704.

ASTERISK: a Hospital Clinical Research Program (PHRC-BRD09/C) from the University Hospital Center of Nantes (CHU de Nantes) and supported by the Regional Council of Pays de la Loire, the Groupement des Entreprises Françaises dans la Lutte contre le Cancer (GEFLUC), the Association Anne de Bretagne Génétique and the Ligue Régionale Contre le Cancer (LRCC).

The ATBC Study is supported by the Intramural Research Program of the U.S. National Cancer Institute, National Institutes of Health, and by U.S. Public Health Service contract HHSN261201500005C from the National Cancer Institute, Department of Health and Human Services.

COLO2&3: National Institutes of Health (R01 CA60987).

ColoCare: This work was supported by the National Institutes of Health (grant numbers R01 CA189184 (Li/Ulrich), U01 CA206110 (Ulrich/Li/Siegel/Figueireido/Colditz, 2P30CA015704-

Additional file 1, Seyed Khoei et al.

40 (Gilliland), R01 CA207371 (Ulrich/Li)), the Matthias Lackas-Foundation, the German Consortium for Translational Cancer Research, and the EU TRANSCAN initiative.

The Colon Cancer Family Registry (CCFR) Illumina GWAS (“CCFR 1” and “CCFR 2”) was supported by funding from the National Cancer Institute, National Institutes of Health (grant numbers U01 CA122839, R01 CA143247 to G Casey). The Colon CFR/CORECT Affymetrix Axiom GWAS (“CCFR 3”) and OncoArray GWAS (“CCFR 4”) were supported by funding from National Cancer Institute, National Institutes of Health (grant number U19 CA148107 to S Gruber). The Colon CFR participant recruitment and collection of data and biospecimens used in this study were supported by the National Cancer Institute, National Institutes of Health (grant number UM1 CA167551) and through cooperative agreements with the following Colon CFR centers: Australasian Colorectal Cancer Family Registry (NCI/NIH grant numbers U01 CA074778 and U01/U24 CA097735), USC Consortium Colorectal Cancer Family Registry (NCI/NIH grant numbers U01/U24 CA074799), Mayo Clinic Cooperative Family Registry for Colon Cancer Studies (NCI/NIH grant number U01/U24 CA074800), Ontario Familial Colorectal Cancer Registry (NCI/NIH grant number U01/U24 CA074783), Seattle Colorectal Cancer Family Registry (NCI/NIH grant number U01/U24 CA074794), and University of Hawaii Colorectal Cancer Family Registry (NCI/NIH grant number U01/U24 CA074806), Additional support for case ascertainment was provided from the Surveillance.

Epidemiology and End Results (SEER) Program of the National Cancer Institute to Fred Hutchinson Cancer Research Center (Control Nos. N01-CN-67009 and N01-PC-35142, and Contract No. HHSN2612013000121), the Hawai'i Department of Health (Control Nos. N01-PC- 67001 and N01-PC-35137, and Contract No. HHSN26120100037C, and the California Department of Public Health (contracts HHSN261201000035C awarded to the University of Southern California, and the following state cancer registries: AZ, CO, MN, NC, NH, and by the Victoria Cancer Registry and Ontario Cancer Registry.

Additional file 1, Seyed Khoei et al.

COLON: The COLON study is sponsored by Wereld Kanker Onderzoek Fonds, including funds from grant 2014/1179 as part of the World Cancer Research Fund International Regular Grant Programme, by Alpe d'Huzes and the Dutch Cancer Society (UM 2012–5653, UW 2013-5927, UW2015-7946), and by TRANSCAN (JTC2012-MetaboCCC, JTC2013-FOCUS). The NQplus study is sponsored by a ZonMW investment grant (98-10030); by PREVIEW, the project PREvention of diabetes through lifestyle intervention and population studies in Europe and around the World (PREVIEW) project which received funding from the European Union Seventh Framework Programme (FP7/2007–2013) under grant no. 312057; by funds from TI Food and Nutrition (cardiovascular health theme), a public–private partnership on precompetitive research in food and nutrition; and by FOOTBALL, the Food Biomarker Alliance, a project from JPI Healthy Diet for a Healthy Life.

Colorectal Transdisciplinary (CORECT) Study: The CORECT Study was supported by the National Cancer Institute, National Institutes of Health (NCI/NIH), U.S. Department of Health and Human Services (grant numbers U19 CA148107, R01 CA81488, P30 CA014089, R01 CA197350,; P01 CA196569; R01 CA201407) and National Institutes of Environmental Health Sciences, National Institutes of Health (grant number T32 ES013678).

CPS-II: The American Cancer Society funds the creation, maintenance, and updating of the Cancer Prevention Study-II (CPS-II) cohort. This study was conducted with Institutional Review Board approval.

DACHS: This work was supported by the German Research Council (BR 1704/6-1, BR 1704/6-3, BR 1704/6-4, CH 117/1-1, HO 5117/2-1, HE 5998/2-1, KL 2354/3-1, RO 2270/8-1 and BR 1704/17-1), the Interdisciplinary Research Program of the National Center for Tumor Diseases (NCT), Germany, and the German Federal Ministry of Education and Research (01KH0404, 01ER0814, 01ER0815, 01ER1505A and 01ER1505B).

Additional file 1, Seyed Khoei et al.

DALS: National Institutes of Health (R01 CA48998 to M. L. Slattery).

EPIC funding: The coordination of EPIC is financially supported by the European Commission (DG-SANCO) and the International Agency for Research on Cancer. The national cohorts are supported by Danish Cancer Society (Denmark); German Cancer Aid, German Cancer Research Center (DKFZ), Federal Ministry of Education and Research (BMBF), Deutsche Krebshilfe, Deutsches Krebsforschungszentrum and Federal Ministry of Education and Research (Germany); the Hellenic Health Foundation (Greece); Associazione Italiana per la Ricerca sul Cancro-AIRC-Italy and National Research Council (Italy); Dutch Ministry of Public Health, Welfare and Sports (VWS), Netherlands Cancer Registry (NKR), LK Research Funds, Dutch Prevention Funds, Dutch ZON (Zorg Onderzoek Nederland), World Cancer Research Fund (WCRF), Statistics Netherlands (The Netherlands); Health Research Fund (FIS) PI13/00061 (EPIC-Granada) and, PI13/01162 (EPIC-Murcia), Regional Governments of Andalucía, Asturias, Basque Country, Murcia and Navarra, ISCIII Health Research Funds RD12/0036/0018 (cofounded by FEDER funds/European Regional Development Fund ERDF) (Spain); Swedish Cancer Society, Swedish Research Council and County Councils of Skåne and Västerbotten (Sweden); Cancer Research UK (14136 to EPIC-Norfolk; C8221/A19170 and C570/A16491 for EPIC-Oxford), Medical Research Council (1000143 to EPIC-Norfolk, MR/M012190/1 to EPIC-Oxford) (UK).

The KORA study was initiated and financed by the Helmholtz Zentrum München – German Research Center for Environmental Health, which is funded by the German Federal Ministry of Education and Research (BMBF) and by the State of Bavaria.

ESTHER/VERDI. This work was supported by grants from the Baden-Württemberg Ministry of Science, Research and Arts and the German Cancer Aid.

Harvard cohorts (HPFS, NHS, PHS): HPFS is supported by the National Institutes of Health

Additional file 1, Seyed Khoei et al.

(P01 CA055075, UM1 CA167552, U01 CA167552, R01 CA137178, R01 CA151993, R35 CA197735, K07 CA190673, and P50 CA127003), NHS by the National Institutes of Health (R01 CA137178, P01 CA087969, UM1 CA186107, R01 CA151993, R35 CA197735, K07 CA190673, and P50 CA127003) and PHS by the National Institutes of Health (R01 CA042182).

Kentucky: This work was supported by the following grant support: Clinical Investigator Award from Damon Runyon Cancer Research Foundation (CI-8); NCI R01CA136726.

MCCS cohort recruitment was funded by VicHealth and Cancer Council Victoria. The MCCS was further supported by Australian NHMRC grants 509348, 209057, 251553 and 504711 and by infrastructure provided by Cancer Council Victoria. Cases and their vital status were ascertained through the Victorian Cancer Registry (VCR) and the Australian Institute of Health and Welfare (AIHW), including the National Death Index and the Australian Cancer Database.

MEC: National Institutes of Health (R37 CA54281, P01 CA033619, and R01 CA063464).

MECC: This work was supported by the National Institutes of Health, U.S. Department of Health and Human Services (R01 CA81488 to SBG and GR).

MSKCC: The work at Sloan Kettering in New York was supported by the Robert and Kate Niehaus Center for Inherited Cancer Genomics and the Romeo Milio Foundation. Moffitt: This work was supported by funding from the National Institutes of Health (grant numbers R01 CA189184, P30 CA076292), Florida Department of Health Bankhead-Coley Grant 09BN-13, and the University of South Florida Oehler Foundation. Moffitt contributions were supported in part by the Total Cancer Care Initiative, Collaborative Data Services Core, and Tissue Core at the H. Lee Moffitt Cancer Center & Research Institute, a National Cancer Institute-designated Comprehensive Cancer Center (grant number P30 CA076292).

NFCCR: This work was supported by an Interdisciplinary Health Research Team award from the Canadian Institutes of Health Research (CRT 43821); the National Institutes of Health, U.S. Department of Health and Human Services (U01 CA74783); and National Cancer Institute of Canada grants (18223 and 18226). The authors wish to acknowledge the contribution of Alexandre Belisle and the genotyping team of the McGill University and Génome Québec Innovation Centre, Montréal, Canada, for genotyping the Sequenom panel in the NFCCR samples. Funding was provided to Michael O. Woods by the Canadian Cancer Society Research Institute.

OFCCR: National Institutes of Health, through funding allocated to the Ontario Registry for Studies of Familial Colorectal Cancer (U01 CA074783); see CCFR section above. Additional funding toward genetic analyses of OFCCR includes the Ontario Research Fund, the Canadian Institutes of Health Research, and the Ontario Institute for Cancer Research, through generous support from the Ontario Ministry of Research and Innovation.

PLCO: Intramural Research Program of the Division of Cancer Epidemiology and Genetics and supported by contracts from the Division of Cancer Prevention, National Cancer Institute, NIH.

PMH: National Institutes of Health (R01 CA076366 to P.A. Newcomb).

SEARCH: The University of Cambridge has received salary support in respect of PDPP from the NHS in the East of England through the Clinical Academic Reserve. Cancer Research UK (C490/A16561); the UK National Institute for Health Research Biomedical Research Centres at the University of Cambridge.

Additional file 1, Seyed Khoei et al.

SPAIN: The SPAIN study was supported by Instituto de Salud Carlos III, co-funded by FEDER funds –a way to build Europe– (grants PI14-613 and PI09-1286), Agency for Management of University and Research Grants (AGAUR) of the Catalan Government (grant 2017SGR723), and Junta de Castilla y León (grant LE22A10-2). Sample collection of this work was supported by the Xarxa de Bancs de Tumors de Catalunya sponsored by Pla Director d'Oncología de Catalunya (XBTC), Plataforma Biobancos PT13/0010/0013 and ICOBIOBANC, sponsored by the Catalan Institute of Oncology.

The Swedish Low-risk Colorectal Cancer Study: The study was supported by grants from the Swedish research council; K2015-55X-22674-01-4, K2008-55X-20157-03-3, K2006-72X-20157-01-2 and the Stockholm County Council (ALF project).

Swedish Mammography Cohort and Cohort of Swedish Men: This work is supported by the Swedish Research Council /Infrastructure grant, the Swedish Cancer Foundation, and the Karolinska Institute's Distinguished Professor Award to Alicja Wolk.

UK Biobank: This research has been conducted using the UK Biobank Resource under Application Number 8614.

VITAL: National Institutes of Health (K05 CA154337).

WHI: The WHI program is funded by the National Heart, Lung, and Blood Institute, National Institutes of Health, U.S. Department of Health and Human Services through contracts HHSN268201100046C, HHSN268201100001C, HHSN268201100002C, HHSN268201100003C, HHSN268201100004C, and HHSN271201100004C.

CLUE II: This research was funded by the American Institute for Cancer Research and the Maryland Cigarette Restitution Fund at Johns Hopkins, and the NCI (P30 CA006973 to W.G. Nelson).



Additional file 1, Seyed Khoei et al.

CORSA: “Österreichische Nationalbank Jubiläumsfondsprojekt” (12511) and Austrian Research Funding Agency (FFG) grant 829675.

Czech Republic CCS: This work was supported by the Grant Agency of the Czech Republic (grants CZ GA CR: GAP304/10/1286 and 1585) and by the Grant Agency of the Ministry of Health of the Czech Republic (grants AZV 15-27580A and AZV 17-30920A).

EDRN: This work is funded and supported by the NCI, EDRN Grant (U01 CA 84968-06).

EPICOLON: This work was supported by grants from Fondo de Investigación Sanitaria/FEDER (PI08/0024, PI08/1276, PS09/02368, P111/00219, PI11/00681, PI14/00173, PI14/00230, PI17/00509, 17/00878, Acción Transversal de Cáncer), Xunta de Galicia (PGIDIT07PXIB9101209PR), Ministerio de Economía y Competitividad (SAF07-64873, SAF 2010-19273, SAF2014-54453R), Fundación Científica de la Asociación Española contra el Cáncer (GCB13131592CAST), Beca Grupo de Trabajo “Oncología” AEG (Asociación Española de Gastroenterología), Fundación Privada Olga Torres, FP7 CHIBCHA Consortium, Agència de Gestió d’Ajuts Universitaris i de Recerca (AGAUR, Generalitat de Catalunya, 2014SGR135, 2014SGR255, 2017SGR21, 2017SGR653), Catalan Tumour Bank Network (Pla Director d’Oncologia, Generalitat de Catalunya), PERIS (SLT002/16/00398, Generalitat de Catalunya), CERCA Programme (Generalitat de Catalunya) and COST Action BM1206. CIBERehd is funded by the Instituto de Salud Carlos III.

Hawaii Adenoma Study: NCI grants R01 CA72520.

HCES-CRC: the Hwasun Cancer Epidemiology Study–Colon and Rectum Cancer (HCES-CRC; grants from Chonnam National University Hwasun Hospital, HCRI15011-1).

Additional file 1, Seyed Khoei et al.

LCCS: The Leeds Colorectal Cancer Study was funded by the Food Standards Agency and Cancer Research UK Programme Award (C588/A19167).

NCCCS I & II: We acknowledge funding support for this project from the National Institutes of Health, R01 CA66635 and P30 DK034987.

NSHDS: Swedish Research Council; Swedish Cancer Society; Cutting-Edge Research Grant and other grants from the County Council of Västerbotten, Sweden; Wallenberg Centre for Molecular Medicine at Umeå University; Lion's Cancer Research Foundation at Umeå University; the Cancer Research Foundation in Northern Sweden; and the Faculty of Medicine, Umeå University, Umeå, Sweden.

OSUMC: OCCPI funding was provided by Pelotonia and HNPCC funding was provided by the NCI (CA16058 and CA67941).

SELECT: The Selenium and Vitamin E Cancer Prevention Trial (SELECT) was supported by the National Cancer Institute of the National Institutes of Health under Award Numbers UM1CA182883 and U10CA37429.

SMS: This work was supported by the National Cancer Institute (grant P01 CA074184 to J.D.P. and P.A.N., grants R01 CA097325, R03 CA153323, and K05 CA152715 to P.A.N., and the National Center for Advancing Translational Sciences at the National Institutes of Health (grant KL2 TR000421 to A.N.B.-H.)

## **Acknowledgements**

We thank Sandra Reitingger and Lina Maqboul for supporting UCB measurement in lab.

ASTERISK: We are very grateful to Dr. Bruno Buecher without whom this project would not have existed. We also thank all those who agreed to participate in this study, including the patients and the healthy control persons, as well as all the physicians, technicians and students.

COLON and NQplus: the authors would like to thank the COLON and NQplus investigators at Wageningen University & Research and the involved clinicians in the participating hospitals.

CPS-II: The authors thank the CPS-II participants and Study Management Group for their invaluable contributions to this research. The authors would also like to acknowledge the contribution to this study from central cancer registries supported through the Centers for Disease Control and Prevention National Program of Cancer Registries, and cancer registries supported by the National Cancer Institute Surveillance Epidemiology and End Results program.

DACHS: We thank all participants and cooperating clinicians, and Ute Handte-Daub, Utz Benschaid, Muhabbet Celik and Ursula Eilber for excellent technical assistance.

Harvard cohorts: The study protocol was approved by the institutional review boards of the Brigham and Women's Hospital and Harvard T.H. Chan School of Public Health, and those of participating registries as required. We would like to thank the participants and staff of the HPFS, NHS, and PHS for their valuable contributions as well as the following state cancer registries for their help: AL, AZ, AR, CA, CO, CT, DE, FL, GA, ID, IL, IN, IA, KY, LA, ME, MD, MA, MI, NE, NH, NJ, NY, NC, ND, OH, OK, OR, PA, RI, SC, TN, TX, VA, WA, WY. The authors assume full responsibility for analyses and interpretation of these data.

Additional file 1, Seyed Khoei et al.

HPFS, NHS and PHS for their valuable contributions as well as the following state cancer registries for their help: AL, AZ, AR, CA, CO, CT, DE, FL, GA, ID, IL, IN, IA, KY, LA, ME, MD, MA, MI, NE, NH, NJ, NY, NC, ND, OH, OK, OR, PA, RI, SC, TN, TX, VA, WA, WY.

The authors assume full responsibility for analyses and interpretation of these data. Kentucky: We would like to acknowledge the staff at the Kentucky Cancer Registry.

PLCO: The authors thank the PLCO Cancer Screening Trial screening center investigators and the staff from Information Management Services Inc and Westat Inc. Most importantly, we thank the study participants for their contributions that made this study possible.

PMH: The authors would like to thank the study participants and staff of the Hormones and Colon Cancer study.

SEARCH: We thank the SEARCH team.

WHI: The authors thank the WHI investigators and staff for their dedication, and the study participants for making the program possible. A full listing of WHI investigators can be found at:

<http://www.whi.org/researchers/Documents%20%20Write%20a%20Paper/WHI%20Investigator%20Short%20List.pdf>

We acknowledge COMPASS (Comprehensive Center for the Advancement of Scientific Strategies) and Deanna Stelling, Mark Thornquist, and Greg Warnick at the Fred Hutchinson Cancer Research Center for their work harmonizing the GECCO epidemiological data set.

CLUE II: We thank Judith Hoffman-Bolton, Senior Research Program Coordinator, for her contributions to the conduct of CLUE and its participation in this study. We also thank the participants in CLUE.

Additional file 1, Seyed Khoei et al.

CORSA: We kindly thank all those who contributed to the screening project Burgenland against CRC. Furthermore, we are grateful to Doris Mejri and Monika Hunjadi for laboratory assistance.

Czech Republic CCS: We are thankful to all clinicians in major hospitals in the Czech Republic, without whom the study would not be practicable. We are also sincerely grateful to all patients participating in this study.

EDRN: We acknowledge all the following contributors to the development of the resource: University of Pittsburgh School of Medicine, Department of Gastroenterology, Hepatology and Nutrition: Lynda Dzubinski; University of Pittsburgh School of Medicine, Department of Pathology: Michelle Bisceglia; and University of Pittsburgh School of Medicine, Department of Biomedical Informatics.

EPICOLON: We are sincerely grateful to all patients participating in this study who were recruited as part of the EPICOLON project. We acknowledge the Spanish National DNA Bank, Biobank of Hospital Clínic–IDIBAPS and Biobanco Vasco for the availability of the samples. The work was carried out (in part) at the Esther Koplowitz Centre, Barcelona.

LCCS: We acknowledge the contributions of Jennifer Barrett, Robin Waxman, Gillian Smith and Emma Northwood in conducting this study.

NCCCS I & II: We would like to thank the study participants, and the NC Colorectal Cancer Study staff.

NSHDS: We thank all participants in the NSHDS cohorts, the staff at the Department of Biobank Research, Umeå University, the staff at Biobanken norr, Västerbotten County

Additional file 1, Seyed Khoei et al.

Council, the scientists managing the Northern Sweden Diet Database.

SELECT: We thank the research and clinical staff at the sites that participated on SELECT study, without whom the trial would not have been successful. We are also grateful to the 35 533 dedicated men who participated in SELECT.
